# Supplementary material for: Late Cardiac Toxic Effects Associated With Treatment Protocols for Hodgkin Lymphoma in Children
Source: PubMed Central journal article supplement (PMC10799264; doi:10.1001/jamanetworkopen.2023.51062), 2024-01-19

## Supplementary Online Content

Lo AC, Liu A, Liu Q, et al. Late cardiac toxic effects associated with treatment protocols for Hodgkin lymphoma in children. *JAMA Netw Open*. 2024;7(1):e2351062.  
doi:10.1001/jamanetworkopen.2023.51062

**eTable 1.** Thirty-Year Cumulative Incidence and 95% CIs (%) of Any Cardiac Disease, Coronary Artery Disease, and Heart Failure for Average 15-Year-Old Patient With Dexrazoxane According to Cumulative Anthracycline Dose and Mean Cardiac Radiotherapy Dose

**eTable 2.** Thirty-Year Cumulative Incidence and 95% CIs (%) of Any Cardiac Disease, Coronary Artery Disease, and Heart Failure for Average 12-Year-Old Patient With Dexrazoxane According to Cumulative Anthracycline Dose and Mean Cardiac Radiotherapy Dose

**eTable 3.** Thirty-Year Cumulative Incidence and 95% CIs (%) of Any Cardiac Disease, Coronary Artery Disease, and Heart Failure for Average 18-Year-Old Patient With Dexrazoxane According to Cumulative Anthracycline Dose and Mean Cardiac Radiotherapy Dose

**eTable 4.** Thirty-Year Cumulative Incidence and 95% CIs (%) of Any Cardiac Disease, Coronary Artery Disease, and Heart Failure for Average 12-Year-Old Female With Dexrazoxane According to Cumulative Anthracycline Dose and Mean Cardiac Radiotherapy Dose

**eTable 5.** Thirty-Year Cumulative Incidence and 95% CIs (%) of Any Cardiac Disease, Coronary Artery Disease, and Heart Failure for Average 12-Year-Old-Male With Dexrazoxane According to Cumulative Anthracycline Dose and Mean Cardiac Radiotherapy Dose

**eTable 6.** Thirty-Year Cumulative Incidence and 95% CIs (%) of Any Cardiac Disease, Coronary Artery Disease and Heart Failure for Average 15-Year-Old Female With Dexrazoxane According to Cumulative Anthracycline Dose and Mean Cardiac Radiotherapy Dose

**eTable 7.** Thirty-Year Cumulative Incidence and 95% CIs (%) of Any Cardiac Disease, Coronary Artery Disease, and Heart Failure for Average 15-Year-Old Male With Dexrazoxane According to Cumulative Anthracycline Dose and Mean Cardiac Radiotherapy Dose

**eTable 8.** Thirty-Year Cumulative Incidence and 95% CIs (%) of Any Cardiac Disease, Coronary Artery Disease, and Heart Failure for Average 18-Year-Old Female With Dexrazoxane According to Cumulative Anthracycline Dose and Mean Cardiac Radiotherapy Dose

**eTable 9.** Thirty-Year Cumulative Incidence and 95% CIs (%) of Any Cardiac Disease, Coronary Artery Disease, and Heart Failure for Average 18-Year-Old Male With Dexrazoxane According to Cumulative Anthracycline Dose and Mean Cardiac Radiotherapy Dose

**eTable 10.** Thirty-Year Cumulative Incidence and 95% CIs (%) of Any Cardiac Disease, Coronary Artery Disease, and Heart Failure for Average 15-Year-Old White Female With Dexrazoxane According to Cumulative Anthracycline Dose and Mean Cardiac Radiotherapy Dose

**eTable 11.** Thirty-Year Cumulative Incidence and 95% CIs (%) of Any Cardiac Disease, Coronary Artery Disease, and Heart Failure for Average 15-Year-Old Black Female With Dexrazoxane According to Cumulative Anthracycline Dose and Mean Cardiac Radiotherapy Dose

**eTable 12.** Thirty-Year Cumulative Incidence and 95% CIs (%) of Any Cardiac Disease, Coronary Artery Disease, and Heart Failure for Average 15-Year-Old Hispanic Female With Dexrazoxane According to Cumulative Anthracycline Dose and Mean Cardiac Radiotherapy Dose

**eTable 13.** Thirty-Year Cumulative Incidence and 95% CIs (%) of Any Cardiac Disease, Coronary Artery Disease, and Heart Failure for Average 15-Year-Old White Male With Dexrazoxane According to Cumulative Anthracycline Dose and Mean Cardiac Radiotherapy Dose

**eTable 14.** Thirty-Year Cumulative Incidence and 95% CIs (%) of Any Cardiac Disease, Coronary Artery Disease, and Heart Failure for Average 15-Year-Old Black Male With Dexrazoxane According to Cumulative Anthracycline Dose and Mean Cardiac Radiotherapy Dose

**eTable 15.** Thirty-Year Cumulative Incidence and 95% CIs (%) of Any Cardiac Disease, Coronary Artery Disease, and Heart Failure for Average 15-Year-Old Hispanic Male With Dexrazoxane According to Cumulative Anthracycline Dose and Mean Cardiac Radiotherapy Dose

**eFigure 1.** Cumulative Incidence of Any Cardiac Disease Based on Mean Heart Dose for Average 15-Year-Old Patient

**eFigure 2.** Thirty-Year Cumulative Incidence of Any Cardiac Disease in the Average 12-Year-Old Female on Each Trial

This supplementary material has been provided by the authors to give readers additional information about their work.

**eTable 1.** Thirty-Year Cumulative Incidence and 95% CIs (%) of Any Cardiac Disease, Coronary Artery Disease, and Heart Failure for Average 15-Year-Old Patient With Dexrazoxane According to Cumulative Anthracycline Dose and Mean Cardiac Radiotherapy Dose

| Mean cardiac RT dose, Gy | Cumulative Anthracycline Dose (mg/m <sup>2</sup> ) |                       |                       |                         |                       |                       |                       |                       |                       |
|--------------------------|----------------------------------------------------|-----------------------|-----------------------|-------------------------|-----------------------|-----------------------|-----------------------|-----------------------|-----------------------|
|                          | Any Cardiac Disease                                |                       |                       | Coronary Artery Disease |                       |                       | Heart Failure         |                       |                       |
|                          | 200 mg/m <sup>2</sup>                              | 250 mg/m <sup>2</sup> | 300 mg/m <sup>2</sup> | 200 mg/m <sup>2</sup>   | 250 mg/m <sup>2</sup> | 300 mg/m <sup>2</sup> | 200 mg/m <sup>2</sup> | 250 mg/m <sup>2</sup> | 300 mg/m <sup>2</sup> |
| 0                        | 5.4 (2.4, 10)                                      | 5.5 (2.5, 10.1)       | 5.7 (2.6, 10.5)       | 2.7 (0.6, 6.5)          | 2.7 (0.6, 6.5)        | 2.8 (0.6, 6.5)        | 2.2 (0.7, 4.7)        | 2.5 (0.7, 5.2)        | 2.8 (0.8, 5.8)        |
| 5                        | 6.3 (2.8, 11.7)                                    | 6.5 (2.9, 11.9)       | 6.7 (3.0, 12.2)       | 3.2 (0.7, 7.6)          | 3.3 (0.7, 7.6)        | 3.3 (0.7, 7.6)        | 2.8 (0.8, 5.8)        | 3.1 (0.9, 6.4)        | 3.5 (1.1, 7.0)        |
| 10                       | 7.4 (3.4, 10.136)                                  | 7.6 (3.5, 14.0)       | 7.8 (3.6, 14.3)       | 3.9 (0.8, 8.9)          | 3.9 (0.9, 9.0)        | 4.0 (0.9, 9.0)        | 3.5 (1.1, 7.2)        | 3.9 (1.2, 7.9)        | 4.4 (1.4, 8.7)        |
| 15                       | 8.7 (4.1, 15.8)                                    | 8.9 (4.2, 16.2)       | 9.2 (4.2, 16.6)       | 4.6 (1.0, 10.8)         | 4.7 (1.0, 10.7)       | 4.7 (1.0, 10.8)       | 4.4 (1.4, 9.1)        | 4.9 (1.6, 9.8)        | 5.5 (1.8, 10.8)       |
| 20                       | 10.2 (4.8, 18.6)                                   | 10.4 (4.9, 18.9)      | 10.8 (5.1, 19.3)      | 5.5 (1.2, 12.9)         | 5.5 (1.2, 13.0)       | 5.6 (1.2, 13.0)       | 5.6 (1.8, 11.3)       | 6.2 (2.1, 12.3)       | 6.9 (2.3, 13.4)       |

**eTable 2.** Thirty-Year Cumulative Incidence and 95% CIs (%) of Any Cardiac Disease, Coronary Artery Disease, and Heart Failure for Average 12-Year-Old Patient With Dexrazoxane According to Cumulative Anthracycline Dose and Mean Cardiac Radiotherapy Dose

| 12 year old              | Cumulative Anthracycline Dose (mg/m <sup>2</sup> ) |                       |                       |                         |                       |                       |                       |                       |                       |
|--------------------------|----------------------------------------------------|-----------------------|-----------------------|-------------------------|-----------------------|-----------------------|-----------------------|-----------------------|-----------------------|
|                          | Any Cardiac Disease                                |                       |                       | Coronary Artery Disease |                       |                       | Heart Failure         |                       |                       |
| Mean cardiac RT dose, Gy | 200 mg/m <sup>2</sup>                              | 250 mg/m <sup>2</sup> | 300 mg/m <sup>2</sup> | 200 mg/m <sup>2</sup>   | 250 mg/m <sup>2</sup> | 300 mg/m <sup>2</sup> | 200 mg/m <sup>2</sup> | 250 mg/m <sup>2</sup> | 300 mg/m <sup>2</sup> |
| 0                        | 4.2 (1.9, 8.0)                                     | 4.3 (2.0, 8.3)        | 4.5 (2.0, 8.4)        | 2.1 (0.4, 4.9)          | 2.1 (0.4, 5.0)        | 2.1 (0.4, 5.0)        | 2.0 (0.6, 4.3)        | 2.2 (0.7, 4.7)        | 2.5 (0.8, 5.2)        |
| 5                        | 5.0 (2.3, 9.2)                                     | 5.1 (2.3, 9.4)        | 5.3 (2.4, 9.7)        | 2.5 (0.5, 6.0)          | 2.5 (0.5, 6.0)        | 2.5 (0.5, 6.0)        | 2.5 (0.8, 5.3)        | 2.8 (0.9, 5.8)        | 3.2 (0.9, 6.4)        |
| 10                       | 5.9 (2.7, 10.9)                                    | 6.0 (2.7, 11.1)       | 6.1 (2.8, 11.3)       | 3.0 (0.6, 7.2)          | 3.0 (0.6, 7.2)        | 3.0 (0.6, 7.2)        | 3.1 (1.0, 6.5)        | 3.5 (1.1, 7.2)        | 3.9 (1.2, 7.9)        |
| 15                       | 6.9 (3.1, 12.8)                                    | 7.1 (3.2, 13.1)       | 7.3 (3.3, 13.4)       | 3.5 (0.8, 8.6)          | 3.6 (0.8, 8.6)        | 3.6 (0.8, 8.6)        | 3.9 (1.3, 8.1)        | 4.4 (1.4, 8.9)        | 4.9 (1.6, 9.8)        |
| 20                       | 8.1 (3.6, 15.0)                                    | 8.3 (3.8, 15.4)       | 8.6 (3.9, 15.7)       | 4.2 (0.9, 10.3)         | 4.2 (0.9, 10.3)       | 4.3 (0.9, 10.3)       | 4.9 (1.7, 10.1)       | 5.5 (1.8, 11.0)       | 6.0 (2.0, 11.9)       |

**eTable 3.** Thirty-Year Cumulative Incidence and 95% CIs (%) of Any Cardiac Disease, Coronary Artery Disease, and Heart Failure for Average 18-Year-Old Patient With Dexrazoxane According to Cumulative Anthracycline Dose and Mean Cardiac Radiotherapy Dose

| 18 year old              | Cumulative Anthracycline Dose (mg/m <sup>2</sup> ) |                       |                       |                         |                       |                       |                       |                       |                       |
|--------------------------|----------------------------------------------------|-----------------------|-----------------------|-------------------------|-----------------------|-----------------------|-----------------------|-----------------------|-----------------------|
|                          | Any Cardiac Disease                                |                       |                       | Coronary Artery Disease |                       |                       | Heart Failure         |                       |                       |
| Mean cardiac RT dose, Gy | 200 mg/m <sup>2</sup>                              | 250 mg/m <sup>2</sup> | 300 mg/m <sup>2</sup> | 200 mg/m <sup>2</sup>   | 250 mg/m <sup>2</sup> | 300 mg/m <sup>2</sup> | 200 mg/m <sup>2</sup> | 250 mg/m <sup>2</sup> | 300 mg/m <sup>2</sup> |
| 0                        | 6.9 (3.0, 12.9)                                    | 7.0 (3.1, 13.2)       | 7.2 (3.2, 13.4)       | 3.5 (0.8, 8.6)          | 3.6 (0.8, 8.5)        | 3.7 (0.8, 8.5)        | 2.5 (0.7, 5.5)        | 2.8 (0.8, 6.1)        | 3.1 (0.9, 6.8)        |
| 5                        | 8.0 (3.6, 14.8)                                    | 8.2 (3.7, 15.1)       | 8.5 (3.7, 15.5)       | 4.3 (0.9, 10.0)         | 4.3 (1.0, 10.0)       | 4.4 (1.0, 10.1)       | 3.2 (0.9, 6.8)        | 3.5 (1.1, 7.4)        | 3.9 (1.2, 8.2)        |
| 10                       | 9.4 (4.2, 17.1)                                    | 9.6 (4.4, 17.3)       | 9.9 (4.5, 17.7)       | 5.1 (1.1, 11.8)         | 5.1 (1.1, 11.9)       | 5.2 (1.1, 11.9)       | 4.0 (1.2, 8.3)        | 4.4 (1.4, 9.1)        | 4.9 (1.5, 10.1)       |
| 15                       | 11.0 (5.1, 19.7)                                   | 11.3 (5.2, 20.1)      | 11.6 (5.4, 20.5)      | 6.1 (1.3, 14.0)         | 6.1 (1.3, 14.0)       | 6.2 (1.4, 14.0)       | 5.0 (1.6, 10.3)       | 5.5 (1.8, 11.2)       | 6.1 (2.0, 12.1)       |
| 20                       | 12.9 (6.0, 23.2)                                   | 13.2 (6.2, 23.5)      | 13.6 (6.4, 23.8)      | 7.2 (1.6, 16.7)         | 7.2 (1.6, 16.9)       | 7.3 (1.6, 16.8)       | 6.2 (2.1, 12.6)       | 6.9 (2.3, 13.7)       | 7.6 (2.5, 15.0)       |

**eTable 4.** Thirty-Year Cumulative Incidence and 95% CIs (%) of Any Cardiac Disease, Coronary Artery Disease, and Heart Failure for Average 12-Year-Old Female With Dexrazoxane According to Cumulative Anthracycline Dose and Mean Cardiac Radiotherapy Dose

| 12 year old female       | Cumulative Anthracycline Dose (mg/m <sup>2</sup> ) |                       |                       |                         |                       |                       |                       |                       |                       |
|--------------------------|----------------------------------------------------|-----------------------|-----------------------|-------------------------|-----------------------|-----------------------|-----------------------|-----------------------|-----------------------|
|                          | Any Cardiac Disease                                |                       |                       | Coronary Artery Disease |                       |                       | Heart Failure         |                       |                       |
| Mean cardiac RT dose, Gy | 200 mg/m <sup>2</sup>                              | 250 mg/m <sup>2</sup> | 300 mg/m <sup>2</sup> | 200 mg/m <sup>2</sup>   | 250 mg/m <sup>2</sup> | 300 mg/m <sup>2</sup> | 200 mg/m <sup>2</sup> | 250 mg/m <sup>2</sup> | 300 mg/m <sup>2</sup> |
| 0                        | 4.1 (1.8, 7.8)                                     | 4.2 (1.9, 7.9)        | 4.4 (1.9, 8.1)        | 1.5 (0.3, 3.9)          | 1.5 (0.3, 3.9)        | 1.5 (0.3, 3.9)        | 2.6 (0.8, 5.9)        | 2.9 (0.9, 6.4)        | 3.3 (1.0, 7.0)        |
| 5                        | 4.9 (2.1, 9.1)                                     | 5.0 (2.2, 9.4)        | 5.1 (2.3, 9.5)        | 1.8 (0.4, 4.5)          | 1.8 (0.4, 4.5)        | 1.8 (0.4, 4.4)        | 3.3 (1.0, 7.1)        | 3.7 (1.1, 7.8)        | 4.2 (1.3, 8.5)        |
| 10                       | 5.7 (2.6, 10.7)                                    | 5.8 (2.6, 11.0)       | 6.0 (2.7, 11.3)       | 2.1 (0.4, 5.4)          | 2.2 (0.4, 5.4)        | 2.2 (0.4, 5.4)        | 4.2 (1.3, 8.9)        | 4.6 (1.5, 9.6)        | 5.2 (1.6, 10.4)       |
| 15                       | 6.7 (3.0, 12.5)                                    | 6.9 (3.1, 12.8)       | 7.1 (3.2, 13.2)       | 2.6 (0.5, 6.5)          | 2.6 (0.5, 6.6)        | 2.6 (0.5, 6.6)        | 5.3 (1.8, 11.2)       | 5.8 (1.9, 12.0)       | 6.5 (2.1, 12.9)       |
| 20                       | 7.9 (3.5, 14.6)                                    | 8.1 (3.6, 15.0)       | 8.3 (3.7, 15.3)       | 3.1 (0.6, 7.8)          | 3.1 (0.6, 7.8)        | 3.1 (0.6, 7.9)        | 6.6 (2.3, 13.6)       | 7.3 (2.5, 14.7)       | 8.1 (2.7, 15.9)       |

**eTable 5.** Thirty-Year Cumulative Incidence and 95% Cis (%) of Any Cardiac Disease, Coronary Artery Disease, and Heart Failure for Average 12-Year-Old-Male With Dexrazoxane According to Cumulative Anthracycline Dose and Mean Cardiac Radiotherapy Dose

| 12 year old male         | Cumulative Anthracycline Dose (mg/m <sup>2</sup> ) |                       |                       |                         |                       |                       |                       |                       |                       |
|--------------------------|----------------------------------------------------|-----------------------|-----------------------|-------------------------|-----------------------|-----------------------|-----------------------|-----------------------|-----------------------|
|                          | Any Cardiac Disease                                |                       |                       | Coronary Artery Disease |                       |                       | Heart Failure         |                       |                       |
| Mean cardiac RT dose, Gy | 200 mg/m <sup>2</sup>                              | 250 mg/m <sup>2</sup> | 300 mg/m <sup>2</sup> | 200 mg/m <sup>2</sup>   | 250 mg/m <sup>2</sup> | 300 mg/m <sup>2</sup> | 200 mg/m <sup>2</sup> | 250 mg/m <sup>2</sup> | 300 mg/m <sup>2</sup> |
| 0                        | 4.3 (2.0, 8.2)                                     | 4.4 (2.0, 8.5)        | 4.6 (2.1, 8.7)        | 2.6 (0.5, 6.3)          | 2.6 (0.5, 6.3)        | 2.7 (0.5, 6.4)        | 1.3 (0.4, 3.0)        | 1.4 (0.4, 3.3)        | 1.6 (0.5, 3.6)        |
| 5                        | 5.1 (2.3, 9.6)                                     | 5.2 (2.4, 9.8)        | 5.4 (2.4, 10.0)       | 3.1 (0.7, 7.4)          | 3.2 (0.7, 7.3)        | 3.2 (0.7, 7.4)        | 1.6 (0.5, 3.7)        | 1.8 (0.6, 4.1)        | 2.0 (0.6, 4.4)        |
| 10                       | 6.0 (2.7, 11.3)                                    | 6.1 (2.8, 11.6)       | 6.3 (2.9, 11.8)       | 3.7 (0.8, 9.0)          | 3.8 (0.8, 9.0)        | 3.8 (0.8, 9.0)        | 2.1 (0.7, 4.6)        | 2.3 (0.7, 5.0)        | 2.6 (0.8, 5.5)        |
| 15                       | 7.0 (3.2, 13.2)                                    | 7.2 (3.2, 13.4)       | 7.4 (3.4, 13.7)       | 4.4 (0.9, 10.7)         | 4.4 (1.0, 10.6)       | 4.5 (1.0, 10.7)       | 2.6 (0.9, 5.8)        | 2.9 (0.9, 6.3)        | 3.2 (1.1, 6.8)        |
| 20                       | 8.2 (3.7, 15.5)                                    | 8.5 (3.9, 15.6)       | 8.7 (4.0, 16.0)       | 5.3 (1.1, 12.7)         | 5.3 (1.1, 12.8)       | 5.4 (1.1, 12.8)       | 3.2 (1.1, 7.3)        | 3.6 (1.2, 7.9)        | 4.0 (1.3, 8.5)        |

**eTable 6.** Thirty-Year Cumulative Incidence and 95% CIs (%) of Any Cardiac Disease, Coronary Artery Disease and Heart Failure for Average 15-Year-Old Female With Dexrazoxane According to Cumulative Anthracycline Dose and Mean Cardiac Radiotherapy Dose

| 15 year old females      | Cumulative Anthracycline Dose (mg/m <sup>2</sup> ) |                       |                       |                         |                       |                       |                       |                       |                       |
|--------------------------|----------------------------------------------------|-----------------------|-----------------------|-------------------------|-----------------------|-----------------------|-----------------------|-----------------------|-----------------------|
|                          | Any Cardiac Disease                                |                       |                       | Coronary Artery Disease |                       |                       | Heart Failure         |                       |                       |
| Mean cardiac RT dose, Gy | 200 mg/m <sup>2</sup>                              | 250 mg/m <sup>2</sup> | 300 mg/m <sup>2</sup> | 200 mg/m <sup>2</sup>   | 250 mg/m <sup>2</sup> | 300 mg/m <sup>2</sup> | 200 mg/m <sup>2</sup> | 250 mg/m <sup>2</sup> | 300 mg/m <sup>2</sup> |
| 0                        | 5.3 (2.3, 9.8)                                     | 5.4 (2.4, 9.9)        | 5.6 (2.4, 10.2)       | 2.0 (0.4, 4.9)          | 2.0 (0.4, 4.8)        | 2.0 (0.4, 4.9)        | 3.0 (0.9, 6.4)        | 3.3 (1.0, 7.0)        | 3.7 (1.1, 7.8)        |
| 5                        | 6.2 (2.8, 11.5)                                    | 6.4 (2.9, 11.8)       | 6.5 (2.9, 12.0)       | 2.4 (0.5, 5.8)          | 2.4 (0.5, 5.8)        | 2.4 (0.5, 5.8)        | 3.7 (1.1, 7.8)        | 4.1 (1.3, 8.7)        | 4.6 (1.4, 9.5)        |
| 10                       | 7.3 (3.3, 13.3)                                    | 7.5 (3.4, 13.6)       | 7.7 (3.5, 14.0)       | 2.9 (0.6, 6.9)          | 2.9 (0.6, 6.9)        | 2.9 (0.6, 7.0)        | 4.7 (1.5, 9.8)        | 5.2 (1.6, 10.6)       | 5.8 (1.8, 11.6)       |
| 15                       | 8.4 (3.9, 15.6)                                    | 8.7 (4.0, 15.9)       | 8.9 (4.1, 16.3)       | 3.4 (0.7, 8.3)          | 3.5 (0.7, 8.3)        | 3.5 (0.7, 8.4)        | 5.9 (1.9, 12.1)       | 6.5 (2.1, 13.1)       | 7.2 (2.3, 14.3)       |
| 20                       | 10.0 (4.5, 18.2)                                   | 10.2 (4.7, 18.6)      | 10.4 (4.8, 19.1)      | 4.1 (0.8, 10.0)         | 4.1 (0.8, 10.1)       | 4.2 (0.8, 10.1)       | 7.4 (2.5, 15.0)       | 8.1 (2.8, 16.2)       | 9.0 (3.1, 17.6)       |



**eTable 7.** Thirty-Year Cumulative Incidence and 95% CIs (%) of Any Cardiac Disease, Coronary Artery Disease, and Heart Failure for Average 15-Year-Old Male With Dexrazoxane According to Cumulative Anthracycline Dose and Mean Cardiac Radiotherapy Dose

| 15 year old male | Cumulative Anthracycline Dose (mg/m <sup>2</sup> ) |                       |                       |                         |                       |                       |                       |                       |                       |
|------------------|----------------------------------------------------|-----------------------|-----------------------|-------------------------|-----------------------|-----------------------|-----------------------|-----------------------|-----------------------|
|                  | Any Cardiac Disease                                |                       |                       | Coronary Artery Disease |                       |                       | Heart Failure         |                       |                       |
|                  | Mean cardiac RT dose, Gy                           | 200 mg/m <sup>2</sup> | 250 mg/m <sup>2</sup> | 300 mg/m <sup>2</sup>   | 200 mg/m <sup>2</sup> | 250 mg/m <sup>2</sup> | 300 mg/m <sup>2</sup> | 200 mg/m <sup>2</sup> | 250 mg/m <sup>2</sup> |
| 0                | 5.5 (2.5, 10.3)                                    | 5.6 (2.6, 10.5)       | 5.8 (2.7, 10.7)       | 3.4 (0.7, 8.2)          | 3.5 (0.7, 8.1)        | 3.5 (0.8, 8.2)        | 1.4 (0.4, 3.5)        | 1.6 (0.5, 3.8)        | 1.8 (0.5, 4.2)        |
| 5                | 6.5 (3.0, 12.0)                                    | 6.6 (3.1, 12.2)       | 6.8 (3.2, 12.6)       | 4.1 (0.9, 9.6)          | 4.2 (0.9, 9.6)        | 4.2 (0.9, 9.6)        | 1.8 (0.6, 4.2)        | 2.0 (0.6, 4.5)        | 2.3 (0.7, 5.0)        |
| 10               | 7.5 (3.5, 14.0)                                    | 7.8 (3.6, 14.2)       | 8.0 (3.7, 14.6)       | 4.9 (1.0, 11.3)         | 5.0 (1.0, 11.2)       | 5.0 (1.1, 11.4)       | 2.3 (0.7, 5.3)        | 2.6 (0.8, 5.7)        | 2.9 (0.9, 6.2)        |
| 15               | 8.9 (4.1, 16.3)                                    | 9.1 (4.3, 16.7)       | 9.4 (4.3, 17.0)       | 5.9 (1.2, 13.3)         | 5.9 (1.3, 13.2)       | 5.9 (1.3, 13.5)       | 2.9 (0.9, 6.5)        | 3.2 (1.0, 7.1)        | 3.6 (1.2, 7.8)        |
| 20               | 10.4 (4.8, 18.9)                                   | 10.7 (4.9, 19.3)      | 11.0 (5.1, 19.7)      | 6.9 (1.5, 15.9)         | 6.9 (1.5, 16.0)       | 7.0 (1.5, 16.1)       | 3.6 (1.2, 8.1)        | 4.1 (1.3, 8.8)        | 4.6 (1.5, 9.6)        |

**eTable 8.** Thirty-Year Cumulative Incidence and 95% CIs (%) of Any Cardiac Disease, Coronary Artery Disease, and Heart Failure for Average 18-Year-Old Female With Dexrazoxane According to Cumulative Anthracycline Dose and Mean Cardiac Radiotherapy Dose

| 18 year old female       | Cumulative Anthracycline Dose (mg/m <sup>2</sup> ) |                       |                       |                         |                       |                       |                       |                       |                       |
|--------------------------|----------------------------------------------------|-----------------------|-----------------------|-------------------------|-----------------------|-----------------------|-----------------------|-----------------------|-----------------------|
|                          | Any Cardiac Disease                                |                       |                       | Coronary Artery Disease |                       |                       | Heart Failure         |                       |                       |
| Mean cardiac RT dose, Gy | 200 mg/m <sup>2</sup>                              | 250 mg/m <sup>2</sup> | 300 mg/m <sup>2</sup> | 200 mg/m <sup>2</sup>   | 250 mg/m <sup>2</sup> | 300 mg/m <sup>2</sup> | 200 mg/m <sup>2</sup> | 250 mg/m <sup>2</sup> | 300 mg/m <sup>2</sup> |
| 0                        | 6.7 (2.8, 12.5)                                    | 6.9 (2.9, 12.7)       | 7.1 (3.0, 13.0)       | 2.6 (0.6, 6.4)          | 2.6 (0.6, 6.4)        | 2.7 (0.6, 6.5)        | 3.4 (0.9, 7.3)        | 3.7 (1.1, 8.1)        | 4.1 (1.2, 8.9)        |
| 5                        | 7.9 (3.4, 14.4)                                    | 8.1 (3.5, 14.8)       | 8.3 (3.6, 15.1)       | 3.1 (0.7, 7.5)          | 3.2 (0.7, 7.6)        | 3.2 (0.7, 7.6)        | 4.2 (1.2, 8.9)        | 4.6 (1.4, 9.7)        | 5.2 (1.6, 10.7)       |
| 10                       | 9.2 (4.1, 16.7)                                    | 9.4 (4.2, 17.0)       | 9.7 (4.4, 17.7)       | 3.8 (0.8, 9.1)          | 3.8 (0.8, 9.1)        | 3.8 (0.8, 9.1)        | 5.3 (1.6, 11.0)       | 5.8 (1.8, 11.9)       | 6.5 (2.0, 13.2)       |
| 15                       | 10.7 (4.9, 19.4)                                   | 11.0 (5.0, 20.0)      | 11.3 (5.2, 20.4)      | 4.5 (0.9, 10.9)         | 4.5 (0.9, 10.8)       | 4.6 (1.0, 10.9)       | 6.6 (2.1, 13.5)       | 7.3 (2.3, 14.7)       | 8.1 (2.5, 16.2)       |
| 20                       | 12.6 (5.7, 22.6)                                   | 12.9 (5.9, 23.1)      | 13.2 (6.1, 23.6)      | 5.4 (1.1, 12.8)         | 5.4 (1.1, 12.9)       | 5.5 (1.1, 13.1)       | 8.3 (2.7, 16.8)       | 9.1 (3.0, 18.0)       | 10.1 (3.3, 19.8)      |

**eTable 9.** Thirty-Year Cumulative Incidence and 95% CIs (%) of Any Cardiac Disease, Coronary Artery Disease, and Heart Failure for Average 18-Year-Old Male With Dexrazoxane According to Cumulative Anthracycline Dose and Mean Cardiac Radiotherapy Dose

| 18 year old male         | Cumulative Anthracycline Dose (mg/m <sup>2</sup> ) |                       |                       |                         |                       |                       |                       |                       |                       |
|--------------------------|----------------------------------------------------|-----------------------|-----------------------|-------------------------|-----------------------|-----------------------|-----------------------|-----------------------|-----------------------|
|                          | Any Cardiac Disease                                |                       |                       | Coronary Artery Disease |                       |                       | Heart Failure         |                       |                       |
| Mean cardiac RT dose, Gy | 200 mg/m <sup>2</sup>                              | 250 mg/m <sup>2</sup> | 300 mg/m <sup>2</sup> | 200 mg/m <sup>2</sup>   | 250 mg/m <sup>2</sup> | 300 mg/m <sup>2</sup> | 200 mg/m <sup>2</sup> | 250 mg/m <sup>2</sup> | 300 mg/m <sup>2</sup> |
| 0                        | 7.0 (3.1, 13.0)                                    | 7.2 (3.2, 13.1)       | 7.4 (3.3, 13.5)       | 4.5 (1.0, 10.8)         | 4.6 (1.0, 10.9)       | 4.6 (1.0, 10.9)       | 1.6 (0.5, 3.9)        | 1.8 (0.5, 4.3)        | 2.0 (0.6, 4.9)        |
| 5                        | 8.2 (3.7, 15.0)                                    | 8.4 (3.9, 15.3)       | 8.7 (4.1, 15.6)       | 5.4 (1.1, 12.7)         | 5.5 (1.2, 12.7)       | 5.5 (1.2, 12.8)       | 2.1 (0.6, 4.8)        | 2.3 (0.7, 5.3)        | 2.6 (0.8, 5.9)        |
| 10                       | 9.6 (4.4, 17.5)                                    | 9.9 (4.6, 17.8)       | 10.2 (4.7, 18.1)      | 6.5 (1.4, 15.1)         | 6.5 (1.4, 15.2)       | 6.6 (1.4, 15.1)       | 2.6 (0.8, 6.0)        | 2.9 (0.9, 6.6)        | 3.2 (1.0, 7.2)        |
| 15                       | 11.3 (5.2, 20.2)                                   | 11.6 (5.3, 20.6)      | 11.9 (5.5, 21.1)      | 7.7 (1.7, 17.6)         | 7.8 (1.7, 17.7)       | 7.8 (1.7, 17.8)       | 3.3 (1.0, 7.4)        | 3.6 (1.1, 8.1)        | 4.1 (1.2, 8.9)        |
| 20                       | 13.1 (6.3, 23.5)                                   | 13.5 (6.4, 23.9)      | 13.9 (6.6, 24.1)      | 9.1 (2.0, 20.8)         | 9.2 (2.0, 21.0)       | 9.3 (2.0, 21.0)       | 4.1 (1.3, 9.2)        | 4.6 (1.5, 10.0)       | 5.1 (1.6, 10.9)       |

**eTable 10.** Thirty-Year Cumulative Incidence and 95% CIs (%) of Any Cardiac Disease, Coronary Artery Disease, and Heart Failure for Average 15-Year-Old White Female With Dexrazoxane According to Cumulative Anthracycline Dose and Mean Cardiac Radiotherapy Dose

| 15 year old white female | Cumulative Anthracycline Dose (mg/m <sup>2</sup> ) |                       |                       |                         |                       |                       |                       |                       |                       |
|--------------------------|----------------------------------------------------|-----------------------|-----------------------|-------------------------|-----------------------|-----------------------|-----------------------|-----------------------|-----------------------|
|                          | Any Cardiac Disease                                |                       |                       | Coronary Artery Disease |                       |                       | Heart Failure         |                       |                       |
|                          | Mean cardiac RT dose, Gy                           | 200 mg/m <sup>2</sup> | 250 mg/m <sup>2</sup> | 300 mg/m <sup>2</sup>   | 200 mg/m <sup>2</sup> | 250 mg/m <sup>2</sup> | 300 mg/m <sup>2</sup> | 200 mg/m <sup>2</sup> | 250 mg/m <sup>2</sup> |
| 0                        | 5.1 (2.2, 9.5)                                     | 5.3 (2.2, 9.6)        | 5.4 (2.3, 9.9)        | 1.9 (0.4, 4.9)          | 1.9 (0.4, 4.9)        | 2.0 (0.4, 5.0)        | 2.8 (0.8, 6.0)        | 3.1 (0.9, 6.6)        | 3.5 (1.0, 7.3)        |
| 5                        | 6.0 (2.5, 11.0)                                    | 6.2 (2.6, 11.3)       | 6.3 (2.7, 11.6)       | 2.3 (0.5, 5.8)          | 2.3 (0.5, 5.8)        | 2.4 (0.5, 5.9)        | 3.5 (1.1, 7.3)        | 3.9 (1.2, 8.1)        | 4.4 (1.4, 8.9)        |
| 10                       | 7.0 (3.1, 12.9)                                    | 7.2 (3.1, 13.4)       | 7.4 (3.2, 13.6)       | 2.8 (0.5, 6.9)          | 2.8 (0.5, 6.9)        | 2.8 (0.6, 6.9)        | 4.4 (1.4, 9.1)        | 4.9 (1.6, 9.9)        | 5.5 (1.8, 10.9)       |
| 15                       | 8.2 (3.7, 15.1)                                    | 8.4 (3.7, 15.6)       | 8.7 (3.9, 16.0)       | 3.3 (0.7, 8.2)          | 3.3 (0.7, 8.2)        | 3.4 (0.7, 8.2)        | 5.6 (1.8, 11.3)       | 6.1 (2.1, 12.2)       | 6.9 (2.3, 13.4)       |
| 20                       | 9.6 (4.2, 17.6)                                    | 9.8 (4.4, 18.1)       | 10.1 (4.6, 18.7)      | 4.0 (0.8, 9.8)          | 4.0 (0.8, 9.8)        | 4.0 (0.8, 9.9)        | 6.9 (2.4, 13.9)       | 7.6 (2.7, 15.1)       | 8.5 (3.0, 16.5)       |

**eTable 11.** Thirty-Year Cumulative Incidence and 95% CIs (%) of Any Cardiac Disease, Coronary Artery Disease, and Heart Failure for Average 15-Year-Old Black Female With Dexrazoxane According to Cumulative Anthracycline Dose and Mean Cardiac Radiotherapy Dose

| 15 year old black female | Cumulative Anthracycline Dose (mg/m <sup>2</sup> ) |                       |                       |                         |                       |                       |                       |                       |                       |
|--------------------------|----------------------------------------------------|-----------------------|-----------------------|-------------------------|-----------------------|-----------------------|-----------------------|-----------------------|-----------------------|
|                          | Any Cardiac Disease                                |                       |                       | Coronary Artery Disease |                       |                       | Heart Failure         |                       |                       |
|                          | Mean cardiac RT dose, Gy                           | 200 mg/m <sup>2</sup> | 250 mg/m <sup>2</sup> | 300 mg/m <sup>2</sup>   | 200 mg/m <sup>2</sup> | 250 mg/m <sup>2</sup> | 300 mg/m <sup>2</sup> | 200 mg/m <sup>2</sup> | 250 mg/m <sup>2</sup> |
| 0                        | 6.2 (2.5, 12.1)                                    | 6.4 (2.5, 12.3)       | 6.6 (2.6, 12.5)       | 2.2 (0.4, 6.0)          | 2.2 (0.4, 6.0)        | 2.2 (0.4, 6.0)        | 3.8 (1.1, 8.7)        | 4.3 (1.2, 9.6)        | 4.8 (1.4, 10.7)       |
| 5                        | 7.3 (3.0, 13.9)                                    | 7.4 (3.0, 14.2)       | 7.7 (3.1, 14.4)       | 2.6 (0.5, 7.1)          | 2.6 (0.5, 7.1)        | 2.7 (0.5, 7.1)        | 4.8 (1.4, 10.6)       | 5.3 (1.6, 11.5)       | 5.9 (1.8, 12.8)       |
| 10                       | 8.5 (3.6, 16.0)                                    | 8.7 (3.7, 16.3)       | 9.0 (3.8, 16.7)       | 3.1 (0.6, 8.3)          | 3.2 (0.6, 8.4)        | 3.2 (0.6, 8.3)        | 6.0 (1.8, 13.1)       | 6.6 (2.0, 14.3)       | 7.4 (2.2, 15.6)       |
| 15                       | 9.9 (4.3, 18.6)                                    | 10.1 (4.4, 18.8)      | 10.4 (4.5, 19.3)      | 3.7 (0.7, 9.9)          | 3.8 (0.7, 9.8)        | 3.8 (0.7, 10.1)       | 7.4 (2.3, 15.9)       | 8.3 (2.5, 17.0)       | 9.3 (2.8, 18.6)       |
| 20                       | 11.5 (5.0, 21.4)                                   | 11.8 (5.2, 21.8)      | 12.1 (5.3, 22.3)      | 4.4 (0.8, 11.8)         | 4.5 (0.8, 11.8)       | 4.5 (0.8, 11.8)       | 9.2 (2.9, 19.5)       | 10.2 (3.2, 20.8)      | 11.3 (3.6, 22.5)      |

**eTable 12.** Thirty-Year Cumulative Incidence and 95% CIs (%) of Any Cardiac Disease, Coronary Artery Disease, and Heart Failure for Average 15-Year-Old Hispanic Female With Dexrazoxane According to Cumulative Anthracycline Dose and Mean Cardiac Radiotherapy Dose

| 15 year old<br>Hispanic<br>female | Cumulative Anthracycline Dose (mg/m <sup>2</sup> ) |                       |                       |                         |                       |                       |                       |                       |                       |
|-----------------------------------|----------------------------------------------------|-----------------------|-----------------------|-------------------------|-----------------------|-----------------------|-----------------------|-----------------------|-----------------------|
|                                   | Any Cardiac Disease                                |                       |                       | Coronary Artery Disease |                       |                       | Heart Failure         |                       |                       |
|                                   | Mean<br>cardiac RT<br>dose, Gy                     | 200 mg/m <sup>2</sup> | 250 mg/m <sup>2</sup> | 300 mg/m <sup>2</sup>   | 200 mg/m <sup>2</sup> | 250 mg/m <sup>2</sup> | 300 mg/m <sup>2</sup> | 200 mg/m <sup>2</sup> | 250 mg/m <sup>2</sup> |
| 0                                 | 4.9 (2.2, 9.3)                                     | 5.0 (2.2, 9.5)        | 5.2 (2.3, 9.8)        | 1.8 (0.4, 4.6)          | 1.9 (0.4, 4.6)        | 1.9 (0.4, 4.6)        | 2.8 (0.8, 6.1)        | 3.1 (0.9, 6.7)        | 3.5 (1.0, 7.4)        |
| 5                                 | 5.7 (2.5, 10.8)                                    | 5.9 (2.6, 11.1)       | 6.1 (2.7, 11.2)       | 2.2 (0.4, 5.4)          | 2.3 (0.5, 5.4)        | 2.3 (0.5, 5.4)        | 3.5 (1.0, 7.6)        | 3.9 (1.2, 8.3)        | 4.3 (1.3, 9.1)        |
| 10                                | 6.7 (3.0, 12.5)                                    | 6.9 (3.1, 12.8)       | 7.1 (3.2, 13.1)       | 2.7 (0.5, 6.4)          | 2.7 (0.5, 6.4)        | 2.7 (0.5, 6.4)        | 4.4 (1.4, 9.6)        | 4.8 (1.5, 10.4)       | 5.4 (1.7, 11.1)       |
| 15                                | 7.8 (3.6, 14.6)                                    | 8.1 (3.7, 15.0)       | 8.3 (3.8, 15.3)       | 3.2 (0.6, 7.6)          | 3.2 (0.7, 7.6)        | 3.2 (0.7, 7.6)        | 5.5 (1.8, 11.7)       | 6.0 (2.1, 12.5)       | 6.7 (2.3, 13.6)       |
| 20                                | 9.2 (4.2, 17.1)                                    | 9.5 (4.4, 17.4)       | 9.8 (4.5, 17.7)       | 3.8 (0.8, 9.2)          | 3.8 (0.8, 9.3)        | 3.9 (0.8, 9.3)        | 6.8 (2.3, 14.3)       | 7.5 (2.6, 15.4)       | 8.3 (2.9, 16.6)       |

**eTable 13.** Thirty-Year Cumulative Incidence and 95% CIs (%) of Any Cardiac Disease, Coronary Artery Disease, and Heart Failure for Average 15-Year-Old White Male With Dexrazoxane According to Cumulative Anthracycline Dose and Mean Cardiac Radiotherapy Dose

| 15 year old white male | Cumulative Anthracycline Dose (mg/m <sup>2</sup> ) |                       |                       |                         |                       |                       |                       |                       |                       |
|------------------------|----------------------------------------------------|-----------------------|-----------------------|-------------------------|-----------------------|-----------------------|-----------------------|-----------------------|-----------------------|
|                        | Any Cardiac Disease                                |                       |                       | Coronary Artery Disease |                       |                       | Heart Failure         |                       |                       |
|                        | Mean cardiac RT dose, Gy                           | 200 mg/m <sup>2</sup> | 250 mg/m <sup>2</sup> | 300 mg/m <sup>2</sup>   | 200 mg/m <sup>2</sup> | 250 mg/m <sup>2</sup> | 300 mg/m <sup>2</sup> | 200 mg/m <sup>2</sup> | 250 mg/m <sup>2</sup> |
| 0                      | 5.4 (2.4, 9.9)                                     | 5.5 (2.5, 10.0)       | 5.7 (2.6, 10.1)       | 3.3 (0.7, 8.0)          | 3.4 (0.7, 8.1)        | 3.4 (0.7, 8.1)        | 1.4 (0.4, 3.3)        | 1.5 (0.5, 3.5)        | 1.7 (0.5, 3.9)        |
| 5                      | 6.3 (2.9, 11.5)                                    | 6.5 (3.0, 11.6)       | 6.7 (3.0, 11.9)       | 4.0 (0.8, 9.4)          | 4.0 (0.8, 9.5)        | 4.1 (0.9, 9.4)        | 1.7 (0.5, 4.0)        | 1.9 (0.6, 4.4)        | 2.2 (0.7, 4.9)        |
| 10                     | 7.4 (3.4, 13.3)                                    | 7.6 (3.4, 13.6)       | 7.8 (3.5, 13.9)       | 4.8 (1.0, 11.1)         | 4.8 (1.0, 11.0)       | 4.8 (1.0, 11.1)       | 2.2 (0.7, 4.9)        | 2.4 (0.8, 5.3)        | 2.7 (0.8, 5.8)        |
| 15                     | 8.7 (3.9, 15.4)                                    | 8.9 (4.0, 15.8)       | 9.2 (4.1, 16.1)       | 5.7 (1.2, 13.2)         | 5.7 (1.2, 13.1)       | 5.8 (1.3, 13.2)       | 2.7 (0.9, 5.9)        | 3.1 (1.0, 6.4)        | 3.4 (1.1, 7.1)        |
| 20                     | 10.2 (4.7, 18.2)                                   | 10.4 (4.8, 18.4)      | 10.7 (4.9, 18.7)      | 6.8 (1.4, 15.6)         | 6.8 (1.4, 15.8)       | 6.8 (1.4, 16.0)       | 3.4 (1.1, 7.3)        | 3.8 (1.2, 8.0)        | 4.3 (1.4, 8.9)        |

**eTable 14.** Thirty-Year Cumulative Incidence and 95% CIs (%) of Any Cardiac Disease, Coronary Artery Disease, and Heart Failure for Average 15-Year-Old Black Male With Dexrazoxane According to Cumulative Anthracycline Dose and Mean Cardiac Radiotherapy Dose

| 15 year old black male | Cumulative Anthracycline Dose (mg/m <sup>2</sup> ) |                       |                       |                         |                       |                       |                       |                       |                       |
|------------------------|----------------------------------------------------|-----------------------|-----------------------|-------------------------|-----------------------|-----------------------|-----------------------|-----------------------|-----------------------|
|                        | Any Cardiac Disease                                |                       |                       | Coronary Artery Disease |                       |                       | Heart Failure         |                       |                       |
|                        | Mean cardiac RT dose, Gy                           | 200 mg/m <sup>2</sup> | 250 mg/m <sup>2</sup> | 300 mg/m <sup>2</sup>   | 200 mg/m <sup>2</sup> | 250 mg/m <sup>2</sup> | 300 mg/m <sup>2</sup> | 200 mg/m <sup>2</sup> | 250 mg/m <sup>2</sup> |
| 0                      | 6.4 (2.7, 12.4)                                    | 6.6 (2.8, 12.7)       | 6.8 (2.9, 12.9)       | 3.7 (0.7, 9.5)          | 3.7 (0.7, 9.7)        | 3.8 (0.7, 9.7)        | 1.9 (0.5, 4.8)        | 2.1 (0.6, 5.3)        | 2.4 (0.6, 5.9)        |
| 5                      | 7.5 (3.3, 14.5)                                    | 7.7 (3.4, 14.7)       | 7.9 (3.4, 15.1)       | 4.4 (0.8, 11.4)         | 4.4 (0.8, 11.6)       | 4.5 (0.9, 11.6)       | 2.4 (0.7, 5.9)        | 2.6 (0.7, 6.4)        | 3.0 (0.8, 7.1)        |
| 10                     | 8.7 (3.8, 16.8)                                    | 9.0 (3.9, 17.2)       | 9.2 (4.0, 17.4)       | 5.3 (0.9, 13.5)         | 5.3 (1.0, 13.5)       | 5.4 (1.0, 13.7)       | 3.0 (0.9, 7.2)        | 3.3 (1.0, 7.8)        | 3.7 (1.1, 8.7)        |
| 15                     | 10.2 (4.4, 19.3)                                   | 10.5 (4.6, 19.5)      | 10.8 (4.8, 20.0)      | 6.3 (1.1, 16.0)         | 6.4 (1.2, 16.1)       | 6.4 (1.2, 16.0)       | 3.7 (1.1, 8.8)        | 4.1 (1.2, 9.5)        | 4.6 (1.4, 10.4)       |
| 20                     | 12.0 (5.2, 22.1)                                   | 12.2 (5.4, 22.4)      | 12.6 (5.5, 22.9)      | 7.5 (1.3, 18.8)         | 7.5 (1.3, 18.9)       | 7.6 (1.3, 18.8)       | 4.7 (1.5, 11.0)       | 5.2 (1.7, 11.7)       | 5.8 (1.9, 13.0)       |



**eTable 15.** Thirty-Year Cumulative Incidence and 95% CIs (%) of Any Cardiac Disease, Coronary Artery Disease, and Heart Failure for Average 15-Year-Old Hispanic Male With Dexrazoxane According to Cumulative Anthracycline Dose and Mean Cardiac Radiotherapy Dose

| 15 year old Hispanic male | Cumulative Anthracycline Dose (mg/m <sup>2</sup> ) |                       |                       |                         |                       |                       |                       |                       |                       |
|---------------------------|----------------------------------------------------|-----------------------|-----------------------|-------------------------|-----------------------|-----------------------|-----------------------|-----------------------|-----------------------|
|                           | Any Cardiac Disease                                |                       |                       | Coronary Artery Disease |                       |                       | Heart Failure         |                       |                       |
|                           | Mean cardiac RT dose, Gy                           | 200 mg/m <sup>2</sup> | 250 mg/m <sup>2</sup> | 300 mg/m <sup>2</sup>   | 200 mg/m <sup>2</sup> | 250 mg/m <sup>2</sup> | 300 mg/m <sup>2</sup> | 200 mg/m <sup>2</sup> | 250 mg/m <sup>2</sup> |
| 0                         | 5.0 (2.3, 9.7)                                     | 5.2 (2.4, 9.9)        | 5.4 (2.5, 10.1)       | 3.2 (0.7, 7.7)          | 3.3 (0.7, 7.7)        | 3.3 (0.7, 7.9)        | 1.4 (0.4, 3.3)        | 1.5 (0.4, 3.6)        | 1.7 (0.5, 4.0)        |
| 5                         | 5.9 (2.8, 11.2)                                    | 6.1 (2.9, 11.3)       | 6.3 (3.0, 11.7)       | 3.9 (0.8, 9.2)          | 3.9 (0.9, 9.2)        | 4.0 (0.9, 9.2)        | 1.7 (0.5, 4.1)        | 1.9 (0.6, 4.4)        | 2.2 (0.6, 4.9)        |
| 10                        | 7.0 (3.3, 13.0)                                    | 7.2 (3.4, 13.3)       | 7.5 (3.5, 13.6)       | 4.6 (1.0, 10.9)         | 4.7 (1.0, 10.9)       | 4.7 (1.0, 11.0)       | 2.2 (0.7, 4.9)        | 2.4 (0.7, 5.4)        | 2.7 (0.8, 6.0)        |
| 15                        | 8.2 (3.9, 15.1)                                    | 8.5 (4.0, 15.5)       | 8.7 (4.1, 15.9)       | 5.6 (1.2, 13.2)         | 5.6 (1.2, 13.1)       | 5.6 (1.2, 13.0)       | 2.7 (0.8, 6.1)        | 3.0 (0.9, 6.7)        | 3.4 (1.0, 7.4)        |
| 20                        | 9.7 (4.5, 17.8)                                    | 9.9 (4.7, 18.3)       | 10.2 (4.9, 18.7)      | 6.5 (1.4, 15.3)         | 6.6 (1.4, 15.4)       | 6.7 (1.5, 15.7)       | 3.4 (1.1, 7.7)        | 3.8 (1.2, 8.4)        | 4.2 (1.3, 9.2)        |

**eFigure 1.** Cumulative Incidence of Any Cardiac Disease Based on Mean Heart Dose for Average 15-Year-Old Patient. A: Doxorubicin=200mg/m<sup>2</sup> with dexrazoxane; B: Doxorubicin=250mg/m<sup>2</sup> with dexrazoxane; C: Doxorubicin=300mg/m<sup>2</sup> with dexrazoxane.

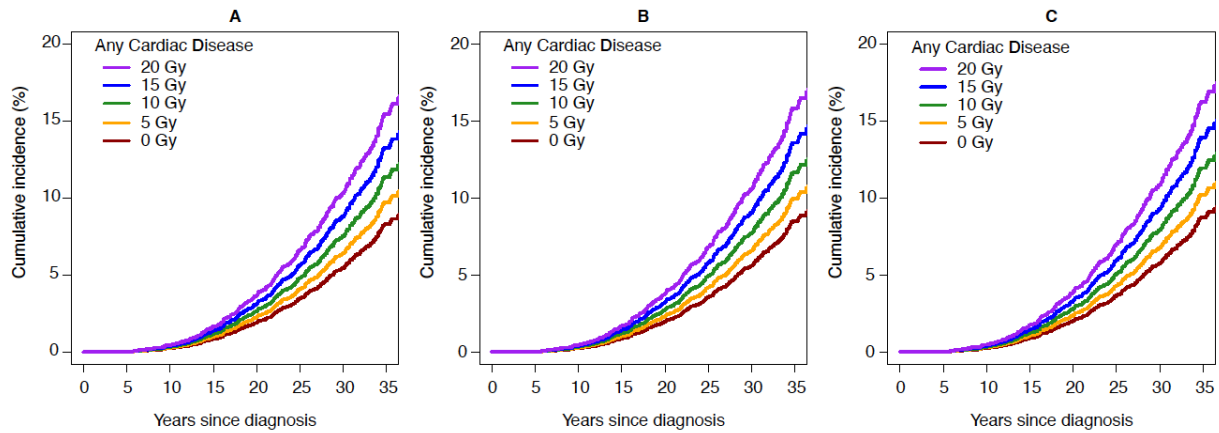

**eFigure 2.** Thirty-Year Cumulative Incidence of Any Cardiac Disease in the Average 12-Year-Old Female on Each Trial. S2-A: AHOD0031 standard arm (85% mediastinal RT); S2-B: AHOD0031 experimental arm (40% mediastinal RT); S2-C: AHOD0831; S2-D: AHOD1331; S2-E: S1826.

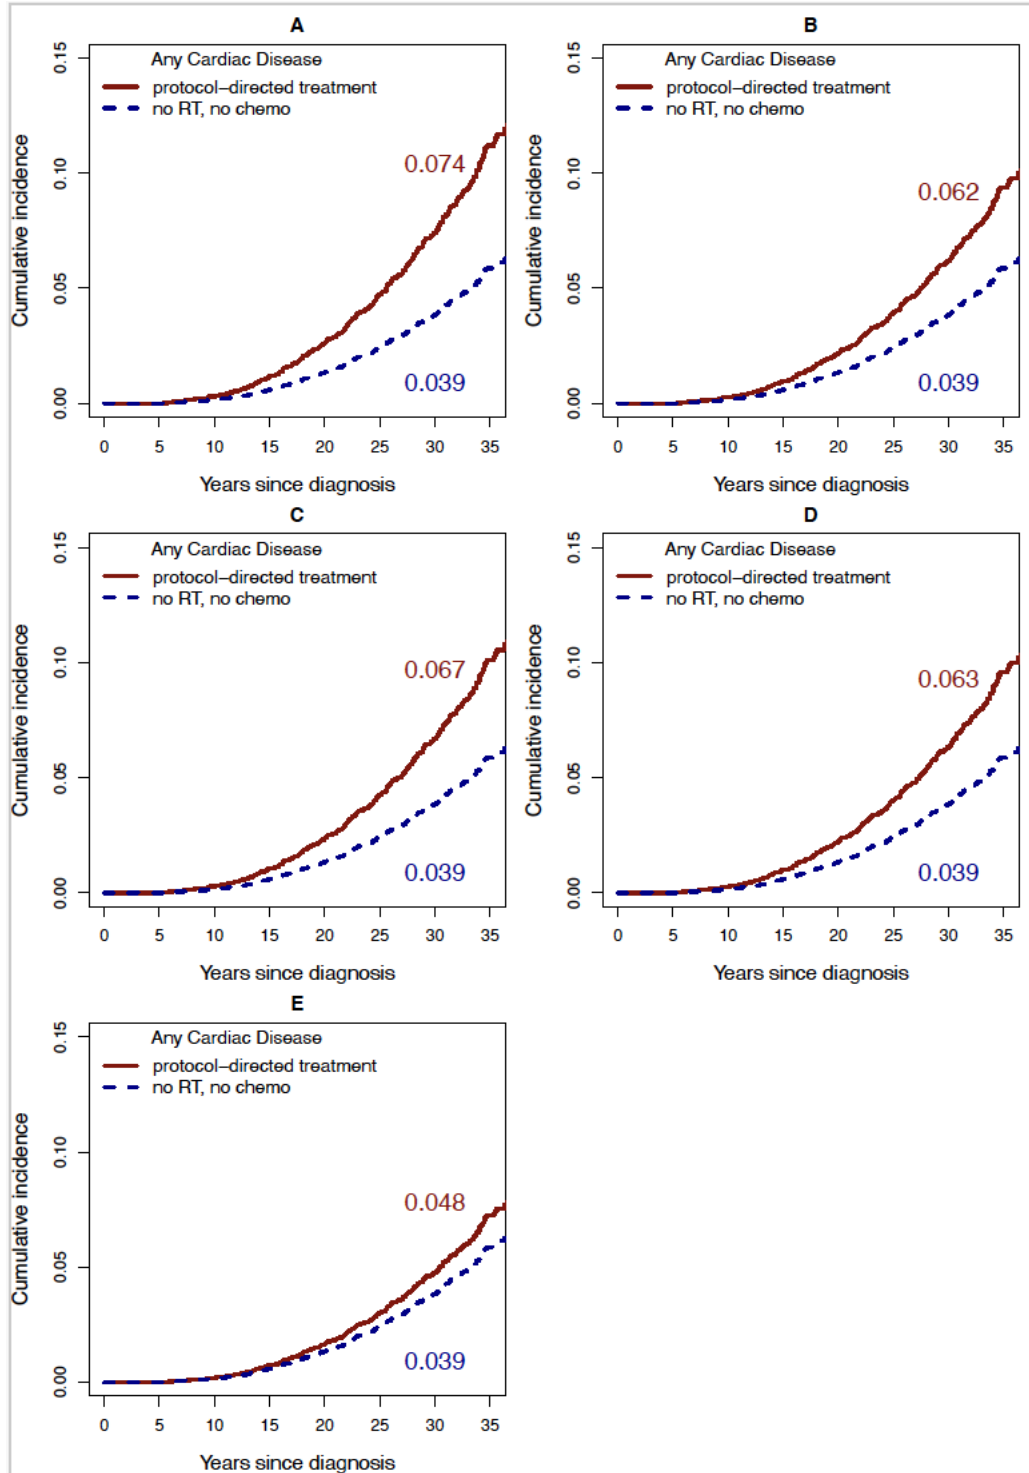

Supplement: jamanetwopen-e2351062-s001.pdf [file jamanetwopen-e2351062-s001.pdf]
