# Supplementary material for: Late Cardiac Toxic Effects Associated With Treatment Protocols for Hodgkin Lymphoma in Children
Source: PubMed Central journal article supplement (PMC10799264; doi:10.1001/jamanetworkopen.2023.51062), 2024-01-19
Supplement: jamanetwopen-e2351062-s002.pdf [file jamanetwopen-e2351062-s002.pdf]

## Data Sharing Statement

Lo. Late Cardiac Toxic Effects Associated With Treatment Protocols for Hodgkin Lymphoma in Children. *JAMA Netw Open*. Published January 19, 2024.

doi:10.1001/jamanetworkopen.2023.51062

### Data

**Data available:** No

### Additional Information

**Explanation for why data not available:** We need to abide by the COG and CCSS data policies. The Children's Oncology Group data underlying this article can be requested at [datarequest@childrensoncologygroup.org](mailto:datarequest@childrensoncologygroup.org). The CCSS data underlying this article can be requested at <https://ccss.stjude.org>.
